# Supplementary material for: Symptomatic Chikungunya Virus Infection and Pregnancy Outcomes: A Nested Case-Control Study in French Guiana
Source: MDPI journal article supplement (doi:10.3390/v14122705), 2022-12-02
Supplement: s1 [file s1]

**Table S1:** Description and measure of outcomes in the pregCHIK study;

| Outcomes                          | Definitions and measures                                                                                                              |
|-----------------------------------|---------------------------------------------------------------------------------------------------------------------------------------|
| <i>Pregnancy outcomes</i>         |                                                                                                                                       |
| Preterm delivery                  | Delivery before 37 weeks of gestation (WG) and after 22 WG of a live newborn weighing more than 500 grams, excluding miscarriages.    |
| Preterm labor                     | A modification of the cervix associated with regular uterine contractions (ultrasound and fetal monitoring)                           |
| preeclampsia                      | Gestational hypertension with proteinuria ( $\geq 300\text{mg}/24\text{h}$ ) after 20 WG.                                             |
| Stillbirth                        | The birth of a dead infant who weighed $>500$ grams or at or after 22 WG.                                                             |
| Fetal growth restriction          | Rate of fetal growth that is below normal in light of the growth potential of a specific infant.                                      |
| Postpartum hemorrhage             | Loss of more than 500 ml of blood during delivery or immediately post-partum (within 5 days of delivery).                             |
| <i>Neonatal outcomes</i>          |                                                                                                                                       |
| Apgar score                       | The five signs of the Apgar score are heart rate, respiratory effort, muscle tone, reflex irritability, and color.                    |
| Respiratory distress              | Respiratory distress of the newborn defined as the need for cardiopulmonary assistance at birth or in the immediate postpartum period |
| Congenital anomalies              | structural or functional abnormalities that occur during intrauterine life and are diagnosed in the immediate postpartum period       |
| NICU admission                    | transfer of the newborn at birth or in the immediate postpartum period to an intensive care unit (ICU or Kangaroo Unit)               |
| Macrosomia                        | Birth weight $> 4,000$ grams                                                                                                          |
| Small for gestational age infants | Birth weight below the 10 <sup>th</sup> percentile for gestational age according Intergrowth-21 <sup>st</sup> classification          |
